# Supplementary material
Source: Springer Nature journal article supplement (https://www.springermedizin.de/resource/supplementary/12950_2009_156_MOESM3_ESM.pdf/9558080)

A

IL-12p70 6h pretreatment

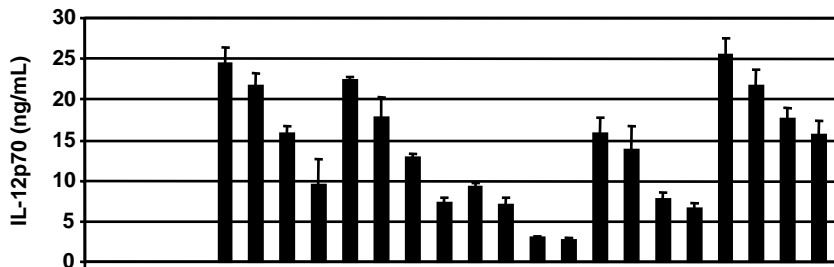

B

IL-12p70 24h pretreatment

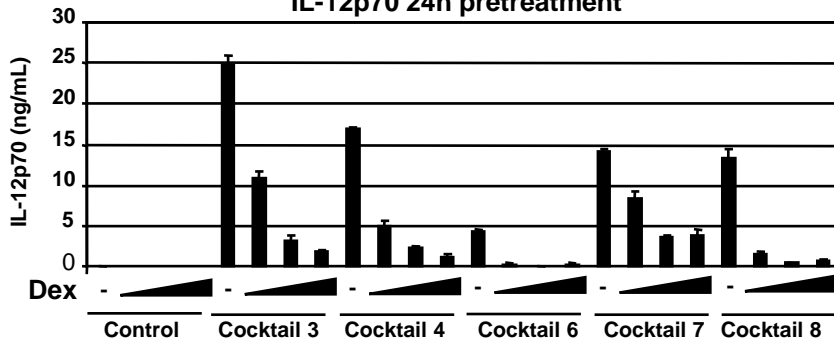

C

TNF $\alpha$  6h pretreatment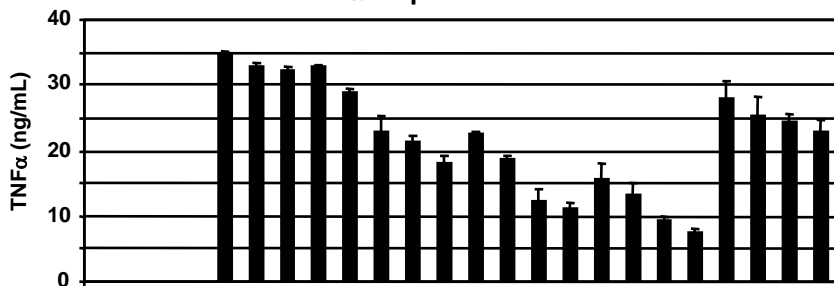

D

TNF $\alpha$  24h pretreatment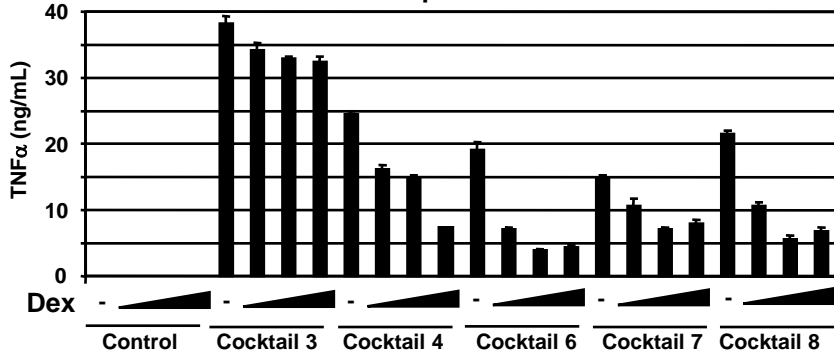

Supplement: MOESM3 [file 9558080]
